# Supplementary material
Source: publisher site journal article supplement (https://www.spandidos-publications.com/3735/downloadSupplementary)
Supplement: Supplementary file 1 [file downloadSupplementary]

Table SI. Detailed information about GO and KEGG terms.

| Group ID  | Category              | Term       | Description                                          | LogP     | Log (q-value) | InTerm_InList |
|-----------|-----------------------|------------|------------------------------------------------------|----------|---------------|---------------|
| 1_Summary | GO Biological Process | GO:0006954 | Inflammatory response                                | -21.1336 | -16.870       | 87/715        |
| 1_Member  | GO Biological Process | GO:0006954 | Inflammatory response                                | -21.1336 | -16.870       | 87/715        |
| 1_Member  | GO Biological Process | GO:0032101 | Regulation of response to external stimulus          | -15.6467 | -11.986       | 82/792        |
| 1_Member  | GO Biological Process | GO:0050727 | Regulation of inflammatory response                  | -15.0181 | -11.533       | 51/363        |
| 1_Member  | GO Biological Process | GO:0031347 | Regulation of defense response                       | -14.7909 | -11.431       | 71/649        |
| 1_Member  | GO Biological Process | GO:0050729 | Positive regulation of inflammatory response         | -10.5187 | -7.824        | 26/142        |
| 1_Member  | GO Biological Process | GO:0031349 | Positive regulation of defense response              | -9.96988 | -7.360        | 43/370        |
| 1_Member  | GO Biological Process | GO:0032103 | Positive regulation of response to external stimulus | -9.18573 | -6.715        | 38/319        |
| 1_Member  | GO Biological Process | GO:0001816 | Cytokine production                                  | -9.02427 | -6.574        | 67/788        |
| 1_Member  | GO Biological Process | GO:0001817 | Regulation of cytokine production                    | -8.05278 | -5.749        | 60/709        |
| 1_Member  | GO Biological Process | GO:0001819 | Positive regulation of cytokine production           | -6.83102 | -4.701        | 42/454        |
| 2_Summary | GO Biological Process | GO:0008285 | Negative regulation of cell proliferation            | -20.3324 | -16.370       | 84/692        |
| 2_Member  | GO Biological Process | GO:0008285 | Negative regulation of cell proliferation            | -20.3324 | -16.370       | 84/692        |

|           |                       |            |                                          |          |         |        |
|-----------|-----------------------|------------|------------------------------------------|----------|---------|--------|
| 2_Member  | GO Biological Process | GO:0010942 | Positive regulation of cell death        | -9.24347 | -6.759  | 63/710 |
|           |                       |            | Positive regulation of programmed cell   |          |         |        |
|           |                       |            | death                                    | -9.10997 | -6.653  | 59/648 |
| 2_Member  | GO Biological Process | GO:0043068 |                                          |          |         |        |
| 2_Member  | GO Biological Process | GO:0043065 | Positive regulation of apoptotic process | -8.81152 | -6.400  | 58/643 |
| 3_Summary | GO Biological Process | GO:0001503 | Ossification                             | -18.0479 | -14.262 | 58/393 |
| 3_Member  | GO Biological Process | GO:0001503 | Ossification                             | -18.0479 | -14.262 | 58/393 |
| 3_Member  | GO Biological Process | GO:0001649 | Osteoblast differentiation               | -11.4336 | -8.602  | 33/207 |
| 3_Member  | GO Biological Process | GO:0030278 | Regulation of ossification               | -10.4013 | -7.740  | 34/238 |
| 3_Member  | GO Biological Process | GO:0031214 | Biominerale tissue development           | -9.8581  | -7.267  | 27/163 |
| 3_Member  | GO Biological Process | GO:0030282 | Bone mineralization                      | -9.79458 | -7.213  | 23/120 |
| 3_Member  | GO Biological Process | GO:0045667 | Regulation of osteoblast differentiation | -6.77178 | -4.649  | 21/145 |
| 3_Member  | GO Biological Process | GO:0045778 | Positive regulation of ossification      | -5.77566 | -3.816  | 16/102 |
|           |                       |            | Regulation of biominerale tissue         |          |         |        |
|           |                       |            | development                              | -5.31724 | -3.477  | 15/98  |
| 3_Member  | GO Biological Process | GO:0070167 | Positive regulation of osteoblast        |          |         |        |
|           |                       |            | differentiation                          | -4.88449 | -3.141  | 12/70  |
| 3_Member  | GO Biological Process | GO:0045669 |                                          |          |         |        |
| 3_Member  | GO Biological Process | GO:0030500 | Regulation of bone mineralization        | -4.2295  | -2.600  | 12/81  |

|           |                       |            |                                         |          |         |        |
|-----------|-----------------------|------------|-----------------------------------------|----------|---------|--------|
| 4_Summary | GO Biological Process | GO:0042330 | Taxis                                   | -15.3748 | -11.811 | 69/603 |
| 4_Member  | GO Biological Process | GO:0042330 | Taxis                                   | -15.3748 | -11.811 | 69/603 |
| 4_Member  | GO Biological Process | GO:0006935 | Chemotaxis                              | -14.9445 | -11.526 | 68/600 |
| 4_Member  | GO Biological Process | GO:0048858 | Cell projection morphogenesis           | -5.18231 | -3.371  | 52/709 |
|           |                       |            | Plasma membrane bounded cell projection |          |         |        |
| 4_Member  | GO Biological Process | GO:0120039 | morphogenesis                           | -4.94665 | -3.185  | 51/704 |
| 4_Member  | GO Biological Process | GO:0048812 | Neuron projection morphogenesis         | -4.86392 | -3.122  | 50/690 |
| 4_Member  | GO Biological Process | GO:0032990 | Cell part morphogenesis                 | -4.79923 | -3.065  | 52/732 |
|           |                       |            | Positive regulation of nervous system   |          |         |        |
| 4_Member  | GO Biological Process | GO:0051962 | development                             | -4.38573 | -2.726  | 47/662 |
|           |                       |            | Regulation of neuron projection         |          |         |        |
| 4_Member  | GO Biological Process | GO:0010975 | development                             | -3.91323 | -2.335  | 43/615 |
| 4_Member  | GO Biological Process | GO:0061564 | Axon development                        | -3.89296 | -2.322  | 38/521 |
| 4_Member  | GO Biological Process | GO:0050769 | Positive regulation of neurogenesis     | -3.70215 | -2.166  | 41/590 |
| 4_Member  | GO Biological Process | GO:0010720 | Positive regulation of cell development | -3.64498 | -2.121  | 45/672 |
| 4_Member  | GO Biological Process | GO:0007411 | Axon guidance                           | -3.60923 | -2.095  | 22/248 |
| 4_Member  | GO Biological Process | GO:0097485 | Neuron projection guidance              | -3.56026 | -2.056  | 22/250 |

|           |                       |            |                                                                    |          |         |        |
|-----------|-----------------------|------------|--------------------------------------------------------------------|----------|---------|--------|
| 4_Member  | GO Biological Process | GO:0045664 | Regulation of neuron differentiation                               | -3.44603 | -1.959  | 50/787 |
| 4_Member  | GO Biological Process | GO:0007409 | Axonogenesis                                                       | -3.01435 | -1.635  | 33/480 |
| 4_Member  | GO Biological Process | GO:0010976 | Positive regulation of neuron projection development               | -2.9043  | -1.553  | 27/372 |
| 4_Member  | GO Biological Process | GO:0031344 | Regulation of cell projection organization                         | -2.83794 | -1.502  | 48/797 |
| 4_Member  | GO Biological Process | GO:0048667 | Cell morphogenesis involved in neuron differentiation              | -2.70292 | -1.406  | 40/643 |
| 4_Member  | GO Biological Process | GO:0045666 | Positive regulation of neuron differentiation                      | -2.56106 | -1.307  | 31/472 |
| 4_Member  | GO Biological Process | GO:0031346 | Positive regulation of cell projection organization                | -2.49289 | -1.254  | 31/477 |
| 4_Member  | GO Biological Process | GO:0120035 | Regulation of plasma membrane bounded cell projection organization | -2.26933 | -1.095  | 45/788 |
| 4_Member  | GO Biological Process | GO:0050770 | Regulation of axonogenesis                                         | -2.19342 | -1.038  | 16/207 |
| 4_Member  | GO Biological Process | GO:1902667 | Regulation of axon guidance                                        | -2.1447  | -0.999  | 6/45   |
| 5_Summary | GO Biological Process | GO:0048514 | Blood vessel morphogenesis                                         | -14.3371 | -11.028 | 69/632 |
| 5_Member  | GO Biological Process | GO:0048514 | Blood vessel morphogenesis                                         | -14.3371 | -11.028 | 69/632 |

|          |                       |            |                                                  |          |         |        |
|----------|-----------------------|------------|--------------------------------------------------|----------|---------|--------|
| 5_Member | GO Biological Process | GO:0072358 | Cardiovascular system development                | -14.0633 | -10.800 | 78/780 |
| 5_Member | GO Biological Process | GO:0001944 | Vasculature development                          | -13.9759 | -10.792 | 77/767 |
| 5_Member | GO Biological Process | GO:0001568 | Blood vessel development                         | -13.626  | -10.509 | 74/731 |
| 5_Member | GO Biological Process | GO:0001525 | Angiogenesis                                     | -12.9973 | -9.938  | 59/521 |
| 5_Member | GO Biological Process | GO:1901342 | Regulation of vasculature development            | -9.17231 | -6.709  | 40/348 |
| 5_Member | GO Biological Process | GO:0045765 | Regulation of angiogenesis                       | -7.82863 | -5.539  | 35/312 |
| 5_Member | GO Biological Process | GO:1904018 | Positive regulation of vasculature development   | -6.98469 | -4.825  | 26/206 |
| 5_Member | GO Biological Process | GO:0001667 | Ameboidal-type cell migration                    | -6.95034 | -4.801  | 40/417 |
| 5_Member | GO Biological Process | GO:0045766 | Positive regulation of angiogenesis              | -6.67673 | -4.571  | 24/186 |
| 5_Member | GO Biological Process | GO:0010631 | Epithelial cell migration                        | -5.18894 | -3.375  | 28/287 |
| 5_Member | GO Biological Process | GO:0090132 | Epithelium migration                             | -5.1318  | -3.333  | 28/289 |
| 5_Member | GO Biological Process | GO:0090130 | Tissue migration                                 | -5.07531 | -3.291  | 28/291 |
| 5_Member | GO Biological Process | GO:0043542 | Endothelial cell migration                       | -3.91087 | -2.334  | 20/204 |
| 5_Member | GO Biological Process | GO:0010634 | Positive regulation of epithelial cell migration | -3.76144 | -2.213  | 16/147 |
| 5_Member | GO Biological Process | GO:0010632 | Regulation of epithelial cell migration          | -3.20071 | -1.779  | 20/231 |

|           |                       |               |                                                              |          |         |        |
|-----------|-----------------------|---------------|--------------------------------------------------------------|----------|---------|--------|
| 5_Member  | GO Biological Process | GO:0010595    | Positive regulation of endothelial cell migration            | -2.29331 | -1.113  | 10/100 |
| 5_Member  | GO Biological Process | GO:0010594    | Regulation of endothelial cell migration                     | -2.0069  | -0.897  | 13/162 |
| 6_Summary | GO Biological Process | GO:0043062    | Extracellular structure organization                         | -14.0214 | -10.800 | 46/319 |
| 6_Member  | GO Biological Process | GO:0043062    | Extracellular structure organization                         | -14.0214 | -10.800 | 46/319 |
| 6_Member  | GO Biological Process | GO:0030198    | Extracellular matrix organization                            | -13.0501 | -9.963  | 41/275 |
| 6_Member  | Reactome Gene Sets    | R-MMU-1474244 | Extracellular matrix organization                            | -9.68019 | -7.116  | 35/266 |
| 6_Member  | Reactome Gene Sets    | R-MMU-1474290 | Collagen formation                                           | -6.40485 | -4.336  | 15/81  |
| 6_Member  | Reactome Gene Sets    | R-MMU-2022090 | Assembly of collagen fibrils and other multimeric structures | -5.86305 | -3.883  | 12/57  |
| 6_Member  | Reactome Gene Sets    | R-MMU-1650814 | Collagen biosynthesis and modifying enzymes                  | -2.74592 | -1.442  | 8/59   |
| 6_Member  | KEGG Pathway          | mmu04974      | Protein digestion and absorption                             | -2.62601 | -1.349  | 10/90  |
| 7_Summary | GO Biological Process | GO:1903047    | Mitotic cell cycle process                                   | -13.741  | -10.592 | 70/665 |
| 7_Member  | GO Biological Process | GO:1903047    | Mitotic cell cycle process                                   | -13.741  | -10.592 | 70/665 |
| 7_Member  | GO Biological Process | GO:0140014    | Mitotic nuclear division                                     | -11.8117 | -8.929  | 38/261 |
| 7_Member  | Reactome Gene Sets    | R-MMU-69278   | Cell cycle, mitotic                                          | -10.1983 | -7.569  | 53/513 |

|          |                       |               |                                                     |          |        |        |
|----------|-----------------------|---------------|-----------------------------------------------------|----------|--------|--------|
| 7_Member | GO Biological Process | GO:0010564    | Regulation of cell cycle process                    | -9.7596  | -7.187 | 57/591 |
| 7_Member | GO Biological Process | GO:0000070    | Mitotic sister chromatid segregation                | -9.36121 | -6.854 | 25/148 |
| 7_Member | Reactome Gene Sets    | R-MMU-1640170 | Cell cycle                                          | -8.89309 | -6.475 | 55/590 |
| 7_Member | GO Biological Process | GO:0051783    | Regulation of nuclear division                      | -8.6775  | -6.289 | 28/196 |
| 7_Member | GO Biological Process | GO:0000280    | Nuclear division                                    | -8.44701 | -6.113 | 43/414 |
| 7_Member | GO Biological Process | GO:0007346    | Regulation of mitotic cell cycle                    | -7.87956 | -5.580 | 50/546 |
| 7_Member | GO Biological Process | GO:0048285    | Organelle fission                                   | -7.80521 | -5.524 | 45/467 |
| 7_Member | GO Biological Process | GO:0007088    | Regulation of mitotic nuclear division              | -7.68463 | -5.413 | 24/165 |
| 7_Member | GO Biological Process | GO:0000819    | Sister chromatid segregation                        | -7.51816 | -5.264 | 25/181 |
| 7_Member | GO Biological Process | GO:0045786    | Negative regulation of cell cycle                   | -7.407   | -5.173 | 43/449 |
| 7_Member | GO Biological Process | GO:0090068    | Positive regulation of cell cycle process           | -7.299   | -5.081 | 30/254 |
| 7_Member | GO Biological Process | GO:0051983    | Regulation of chromosome segregation                | -7.02144 | -4.855 | 18/105 |
| 7_Member | GO Biological Process | GO:0045930    | Negative regulation of mitotic cell cycle           | -6.97445 | -4.819 | 28/234 |
| 7_Member | GO Biological Process | GO:0051784    | Negative regulation of nuclear division             | -6.87153 | -4.736 | 14/65  |
| 7_Member | GO Biological Process | GO:0030071    | Regulation of mitotic metaphase/anaphase transition | -6.83108 | -4.701 | 13/56  |
| 7_Member | GO Biological Process | GO:0031577    | Spindle checkpoint                                  | -6.6791  | -4.571 | 11/40  |

|          |                       |               |                                                              |          |        |        |
|----------|-----------------------|---------------|--------------------------------------------------------------|----------|--------|--------|
| 7_Member | GO Biological Process | GO:1902099    | Regulation of metaphase/anaphase transition of cell cycle    | -6.63927 | -4.540 | 13/58  |
| 7_Member | GO Biological Process | GO:0007091    | Metaphase/anaphase transition of mitotic cell cycle          | -6.54658 | -4.460 | 13/59  |
| 7_Member | GO Biological Process | GO:0010965    | Regulation of mitotic sister chromatid separation            | -6.45593 | -4.380 | 13/60  |
| 7_Member | GO Biological Process | GO:0044784    | Metaphase/anaphase transition of cell cycle                  | -6.36724 | -4.313 | 13/61  |
| 7_Member | GO Biological Process | GO:0045787    | Positive regulation of cell cycle                            | -6.35238 | -4.301 | 35/358 |
| 7_Member | GO Biological Process | GO:0045839    | Negative regulation of mitotic nuclear division              | -6.1314  | -4.111 | 12/54  |
| 7_Member | GO Biological Process | GO:0051306    | Mitotic sister chromatid separation                          | -6.11225 | -4.095 | 13/64  |
| 7_Member | GO Biological Process | GO:1905818    | Regulation of chromosome separation                          | -6.03073 | -4.023 | 13/65  |
| 7_Member | GO Biological Process | GO:0098813    | Nuclear chromosome segregation                               | -5.99456 | -3.996 | 28/261 |
| 7_Member | GO Biological Process | GO:0071174    | Mitotic spindle checkpoint                                   | -5.92902 | -3.940 | 10/38  |
| 7_Member | GO Biological Process | GO:0045841    | Negative regulation of mitotic metaphase/anaphase transition | -5.70567 | -3.762 | 10/40  |
| 7_Member | Reactome Gene Sets    | R-MMU-2500257 | Resolution of Sister Chromatid Cohesion                      | -5.62205 | -3.695 | 17/117 |



|          |                       |             |                                                                    |          |        |        |
|----------|-----------------------|-------------|--------------------------------------------------------------------|----------|--------|--------|
| 7_Member | GO Biological Process | GO:1902100  | Negative regulation of metaphase/anaphase transition of cell cycle | -5.59936 | -3.685 | 10/41  |
| 7_Member | GO Biological Process | GO:2000816  | Negative regulation of mitotic sister chromatid separation         | -5.59936 | -3.685 | 10/41  |
| 7_Member | GO Biological Process | GO:0033047  | Regulation of mitotic sister chromatid segregation                 | -5.57418 | -3.663 | 13/71  |
| 7_Member | GO Biological Process | GO:0007059  | Chromosome segregation                                             | -5.55748 | -3.654 | 31/322 |
| 7_Member | GO Biological Process | GO:1905819  | Negative regulation of chromosome separation                       | -5.49638 | -3.617 | 10/42  |
| 7_Member | GO Biological Process | GO:0010948  | Negative regulation of cell cycle process                          | -5.38837 | -3.533 | 24/219 |
| 7_Member | GO Biological Process | GO:0033048  | Negative regulation of mitotic sister chromatid segregation        | -5.29966 | -3.466 | 10/44  |
| 7_Member | Reactome Gene Sets    | R-MMU-68886 | M phase                                                            | -5.29831 | -3.466 | 35/398 |
| 7_Member | GO Biological Process | GO:0007094  | Mitotic spindle assembly checkpoint                                | -5.19045 | -3.375 | 9/36   |
| 7_Member | GO Biological Process | GO:0071173  | Spindle assembly checkpoint                                        | -5.19045 | -3.375 | 9/36   |
| 7_Member | GO Biological Process | GO:0044772  | Mitotic cell cycle phase transition                                | -5.18355 | -3.371 | 33/369 |

|          |                       |               |                                                                                   |          |        |        |
|----------|-----------------------|---------------|-----------------------------------------------------------------------------------|----------|--------|--------|
| 7_Member | GO Biological Process | GO:0033046    | Negative regulation of sister chromatid segregation                               | -5.11426 | -3.321 | 10/46  |
| 7_Member | GO Biological Process | GO:0044770    | Cell cycle phase transition                                                       | -5.06246 | -3.280 | 35/408 |
| 7_Member | GO Biological Process | GO:0045931    | Positive regulation of mitotic cell cycle                                         | -4.97457 | -3.208 | 20/172 |
| 7_Member | GO Biological Process | GO:0051985    | Negative regulation of chromosome segregation                                     | -4.93908 | -3.182 | 10/48  |
| 7_Member | Reactome Gene Sets    | R-MMU-9648025 | EML4 and NUDC in mitotic spindle formation                                        | -4.89085 | -3.144 | 15/106 |
| 7_Member | GO Biological Process | GO:0033045    | Regulation of sister chromatid segregation                                        | -4.74148 | -3.012 | 13/84  |
| 7_Member | Reactome Gene Sets    | R-MMU-141424  | Amplification of signal from the kinetochores                                     | -4.41409 | -2.746 | 13/90  |
| 7_Member | Reactome Gene Sets    | R-MMU-141444  | Amplification of signal from unattached kinetochores via a MAD2 inhibitory signal | -4.41409 | -2.746 | 13/90  |
| 7_Member | Reactome Gene Sets    | R-MMU-68877   | Mitotic Prometaphase                                                              | -4.40779 | -2.743 | 20/188 |
| 7_Member | GO Biological Process | GO:0007093    | Mitotic cell cycle checkpoint                                                     | -4.40302 | -2.740 | 16/130 |
| 7_Member | Reactome Gene Sets    | R-MMU-69618   | Mitotic Spindle Checkpoint                                                        | -4.26482 | -2.628 | 14/106 |
| 7_Member | Reactome Gene Sets    | R-MMU-195258  | RHO GTPase Effectors                                                              | -4.22786 | -2.599 | 27/307 |

|          |                       |               |                                                            |          |        |        |
|----------|-----------------------|---------------|------------------------------------------------------------|----------|--------|--------|
| 7_Member | GO Biological Process | GO:0051304    | Chromosome separation                                      | -4.16352 | -2.542 | 13/95  |
| 7_Member | GO Biological Process | GO:1901987    | Regulation of cell cycle phase transition                  | -4.03685 | -2.440 | 26/298 |
| 7_Member | GO Biological Process | GO:1901990    | Regulation of mitotic cell cycle phase transition          | -3.99617 | -2.404 | 24/266 |
| 7_Member | GO Biological Process | GO:1901991    | Negative regulation of mitotic cell cycle phase transition | -3.93821 | -2.355 | 16/142 |
| 7_Member | GO Biological Process | GO:1901988    | Negative regulation of cell cycle phase transition         | -3.89756 | -2.324 | 17/158 |
| 7_Member | Reactome Gene Sets    | R-MMU-5663220 | RHO GTPases Activate Formins                               | -3.80715 | -2.252 | 15/131 |
| 7_Member | GO Biological Process | GO:0000075    | Cell cycle checkpoint                                      | -3.68627 | -2.153 | 18/180 |
| 7_Member | GO Biological Process | GO:0051129    | negative regulation of cellular component organization     | -3.62667 | -2.110 | 50/773 |
| 7_Member | Reactome Gene Sets    | R-MMU-194315  | Signaling by Rho GTPases                                   | -3.30169 | -1.848 | 31/424 |
| 7_Member | Reactome Gene Sets    | R-MMU-68882   | Mitotic Anaphase                                           | -3.10437 | -1.706 | 19/218 |
| 7_Member | GO Biological Process | GO:0045840    | Positive regulation of mitotic nuclear division            | -3.09123 | -1.696 | 9/65   |
| 7_Member | Reactome Gene Sets    | R-MMU-2555396 | Mitotic Metaphase and Anaphase                             | -3.08043 | -1.688 | 19/219 |

|           |                       |               |                                            |          |        |        |
|-----------|-----------------------|---------------|--------------------------------------------|----------|--------|--------|
| 7_Member  | GO Biological Process | GO:0051785    | Positive regulation of nuclear division    | -2.97578 | -1.610 | 10/81  |
| 7_Member  | Reactome Gene Sets    | R-MMU-2467813 | Separation of Sister Chromatids            | -2.76716 | -1.450 | 16/181 |
|           |                       |               | Positive regulation of mitotic cell cycle  |          |        |        |
| 7_Member  | GO Biological Process | GO:1901992    | phase transition                           | -2.66231 | -1.375 | 10/89  |
|           |                       |               | Negative regulation of chromosome          |          |        |        |
| 7_Member  | GO Biological Process | GO:2001251    | organization                               | -2.35247 | -1.159 | 13/147 |
|           |                       |               | Negative regulation of organelle           |          |        |        |
| 7_Member  | GO Biological Process | GO:0010639    | organization                               | -2.2352  | -1.070 | 27/416 |
|           |                       |               | Positive regulation of cell cycle phase    |          |        |        |
| 7_Member  | GO Biological Process | GO:1901989    | transition                                 | -2.20318 | -1.045 | 10/103 |
| 8_Summary | KEGG Pathway          | mmu04668      | TNF signaling pathway                      | -12.6246 | -9.592 | 25/107 |
| 8_Member  | KEGG Pathway          | mmu04668      | TNF signaling pathway                      | -12.6246 | -9.592 | 25/107 |
| 8_Member  | KEGG Pathway          | mmu04657      | IL-17 signaling pathway                    | -10.5975 | -7.878 | 21/91  |
| 8_Member  | GO Biological Process | GO:0002237    | Response to molecule of bacterial origin   | -7.6528  | -5.385 | 40/393 |
| 8_Member  | GO Biological Process | GO:0032496    | Response to lipopolysaccharide             | -7.28037 | -5.067 | 38/374 |
|           |                       |               | Cellular response to molecule of bacterial |          |        |        |
| 8_Member  | GO Biological Process | GO:0071219    | origin                                     | -5.70494 | -3.762 | 30/301 |

|           |                       |            |                                                                  |          |        |        |
|-----------|-----------------------|------------|------------------------------------------------------------------|----------|--------|--------|
| 8_Member  | GO Biological Process | GO:0071396 | Cellular response to lipid                                       | -5.33829 | -3.489 | 48/626 |
| 8_Member  | GO Biological Process | GO:0071216 | Cellular response to biotic stimulus                             | -5.06125 | -3.280 | 30/324 |
| 8_Member  | GO Biological Process | GO:0071222 | Cellular response to lipopolysaccharide                          | -5.04729 | -3.268 | 28/292 |
| 8_Member  | KEGG Pathway          | mmu04621   | NOD-like receptor signaling pathway                              | -3.0815  | -1.688 | 16/169 |
| 9_Summary | GO Biological Process | GO:0033002 | Muscle cell proliferation                                        | -12.5743 | -9.566 | 37/235 |
| 9_Member  | GO Biological Process | GO:0033002 | Muscle cell proliferation                                        | -12.5743 | -9.566 | 37/235 |
| 9_Member  | GO Biological Process | GO:0048659 | Smooth muscle cell proliferation                                 | -11.6767 | -8.812 | 30/169 |
| 9_Member  | GO Biological Process | GO:0048660 | Regulation of smooth muscle cell proliferation                   | -11.3339 | -8.533 | 29/163 |
| 9_Member  | GO Biological Process | GO:0048661 | Positive regulation of smooth muscle cell proliferation          | -7.70285 | -5.427 | 19/106 |
| 9_Member  | GO Biological Process | GO:1904705 | Regulation of vascular smooth muscle cell proliferation          | -7.13627 | -4.952 | 13/53  |
| 9_Member  | GO Biological Process | GO:1990874 | Vascular smooth muscle cell proliferation                        | -7.03208 | -4.862 | 13/54  |
| 9_Member  | GO Biological Process | GO:0014909 | Smooth muscle cell migration                                     | -5.54887 | -3.647 | 15/94  |
| 9_Member  | GO Biological Process | GO:1904707 | Positive regulation of vascular smooth muscle cell proliferation | -5.30042 | -3.466 | 9/35   |

|            |                       |            |                                            |          |        |        |
|------------|-----------------------|------------|--------------------------------------------|----------|--------|--------|
| 9_Member   | GO Biological Process | GO:0014812 | Muscle cell migration                      | -4.79121 | -3.060 | 15/108 |
|            |                       |            | Regulation of smooth muscle cell           |          |        |        |
| 9_Member   | GO Biological Process | GO:0014910 | migration                                  | -4.68472 | -2.964 | 13/85  |
|            |                       |            | Positive regulation of smooth muscle cell  |          |        |        |
| 9_Member   | GO Biological Process | GO:0014911 | migration                                  | -3.93388 | -2.353 | 10/62  |
|            |                       |            | Positive regulation of cellular component  |          |        |        |
| 10_Summary | GO Biological Process | GO:0051272 | movement                                   | -12.5143 | -9.530 | 63/595 |
|            |                       |            | Positive regulation of cellular component  |          |        |        |
| 10_Member  | GO Biological Process | GO:0051272 | movement                                   | -12.5143 | -9.530 | 63/595 |
| 10_Member  | GO Biological Process | GO:2000147 | Positive regulation of cell motility       | -12.133  | -9.206 | 61/576 |
| 10_Member  | GO Biological Process | GO:0040017 | Positive regulation of locomotion          | -12.1263 | -9.206 | 63/607 |
| 10_Member  | GO Biological Process | GO:0030335 | Positive regulation of cell migration      | -11.8847 | -8.983 | 59/553 |
| 10_Member  | GO Biological Process | GO:0002685 | Regulation of leukocyte migration          | -8.61642 | -6.245 | 29/210 |
| 10_Member  | GO Biological Process | GO:0002687 | Positive regulation of leukocyte migration | -7.16361 | -4.972 | 22/150 |
| 10_Member  | GO Biological Process | GO:0050920 | Regulation of chemotaxis                   | -7.05723 | -4.884 | 27/218 |
| 10_Member  | GO Biological Process | GO:0002688 | Regulation of leukocyte chemotaxis         | -5.03091 | -3.255 | 16/116 |
| 10_Member  | GO Biological Process | GO:0050921 | Positive regulation of chemotaxis          | -3.90211 | -2.327 | 16/143 |

|            |                       |            |                                                |          |        |        |
|------------|-----------------------|------------|------------------------------------------------|----------|--------|--------|
| 10_Member  | GO Biological Process | GO:0002690 | Positive regulation of leukocyte chemotaxis    | -3.77831 | -2.227 | 12/90  |
| 11_Summary | GO Biological Process | GO:0023014 | Signal transduction by protein phosphorylation | -12.1293 | -9.206 | 75/799 |
| 11_Member  | GO Biological Process | GO:0023014 | Signal transduction by protein phosphorylation | -12.1293 | -9.206 | 75/799 |
| 11_Member  | GO Biological Process | GO:0070371 | ERK1 and ERK2 cascade                          | -11.4358 | -8.602 | 43/334 |
| 11_Member  | GO Biological Process | GO:0000165 | MAPK cascade                                   | -11.4148 | -8.599 | 72/776 |
| 11_Member  | GO Biological Process | GO:0043408 | Regulation of MAPK cascade                     | -11.1466 | -8.361 | 68/720 |
| 11_Member  | GO Biological Process | GO:0070372 | Regulation of ERK1 and ERK2 cascade            | -10.4911 | -7.808 | 40/315 |
| 11_Member  | GO Biological Process | GO:0043410 | Positive regulation of MAPK cascade            | -9.41428 | -6.884 | 52/523 |
| 11_Member  | GO Biological Process | GO:0070374 | Positive regulation of ERK1 and ERK2 cascade   | -9.19025 | -6.715 | 31/224 |
| 11_Member  | GO Biological Process | GO:0051345 | Positive regulation of hydrolase activity      | -2.14675 | -0.999 | 32/525 |
| 12_Summary | GO Biological Process | GO:0050900 | Leukocyte migration                            | -10.964  | -8.192 | 43/345 |
| 12_Member  | GO Biological Process | GO:0050900 | Leukocyte migration                            | -10.964  | -8.192 | 43/345 |
| 12_Member  | GO Biological Process | GO:0060326 | Cell chemotaxis                                | -10.5555 | -7.849 | 39/300 |
| 12_Member  | GO Biological Process | GO:1990868 | Response to chemokine                          | -8.9667  | -6.530 | 17/71  |

|            |                       |              |                                       |          |        |        |
|------------|-----------------------|--------------|---------------------------------------|----------|--------|--------|
| 12_Member  | GO Biological Process | GO:1990869   | Cellular response to chemokine        | -8.9667  | -6.530 | 17/71  |
| 12_Member  | GO Biological Process | GO:0030595   | Leukocyte chemotaxis                  | -8.51997 | -6.171 | 29/212 |
| 12_Member  | GO Biological Process | GO:0097529   | Myeloid leukocyte migration           | -7.48657 | -5.236 | 27/208 |
| 12_Member  | GO Biological Process | GO:0070098   | Chemokine-mediated signaling pathway  | -7.24247 | -5.040 | 14/61  |
| 12_Member  | GO Biological Process | GO:1990266   | Neutrophil migration                  | -5.57005 | -3.662 | 17/118 |
| 12_Member  | GO Biological Process | GO:0097530   | Granulocyte migration                 | -5.51819 | -3.635 | 19/145 |
| 12_Member  | GO Biological Process | GO:0071621   | Granulocyte chemotaxis                | -5.46788 | -3.597 | 17/120 |
| 12_Member  | GO Biological Process | GO:0030593   | Neutrophil chemotaxis                 | -5.37392 | -3.522 | 15/97  |
| 12_Member  | Reactome Gene Sets    | R-MMU-380108 | Chemokine receptors bind chemokines   | -4.05799 | -2.456 | 10/60  |
| 12_Member  | Reactome Gene Sets    | R-MMU-373076 | Class A/1 (Rhodopsin-like receptors)  | -3.57382 | -2.067 | 25/301 |
| 12_Member  | Reactome Gene Sets    | R-MMU-375276 | Peptide ligand-binding receptors      | -3.3977  | -1.926 | 18/190 |
| 12_Member  | Reactome Gene Sets    | R-MMU-418594 | G alpha (i) signalling events         | -2.92593 | -1.571 | 26/352 |
| 12_Member  | Reactome Gene Sets    | R-MMU-500792 | GPCR ligand binding                   | -2.67447 | -1.385 | 27/386 |
| 12_Member  | GO Biological Process | GO:0019730   | Antimicrobial humoral response        | -2.56175 | -1.307 | 13/139 |
| 12_Member  | GO Biological Process | GO:0031640   | Killing of cells of other organism    | -2.10089 | -0.968 | 7/60   |
| 12_Member  | GO Biological Process | GO:0044364   | Disruption of cells of other organism | -2.10089 | -0.968 | 7/60   |
| 13_Summary | GO Biological Process | GO:0050673   | Epithelial cell proliferation         | -10.7911 | -8.033 | 49/435 |



|            |                       |            |                                                       |          |        |        |
|------------|-----------------------|------------|-------------------------------------------------------|----------|--------|--------|
| 13_Member  | GO Biological Process | GO:0050673 | Epithelial cell proliferation                         | -10.7911 | -8.033 | 49/435 |
| 13_Member  | GO Biological Process | GO:0050678 | Regulation of epithelial cell proliferation           | -6.98814 | -4.825 | 37/368 |
| 13_Member  | GO Biological Process | GO:0001935 | Endothelial cell proliferation                        | -5.47326 | -3.601 | 19/146 |
| 13_Member  | GO Biological Process | GO:0050679 | Positive regulation of epithelial cell proliferation  | -5.25529 | -3.427 | 23/208 |
| 13_Member  | GO Biological Process | GO:0001936 | Regulation of endothelial cell proliferation          | -4.36191 | -2.705 | 16/131 |
| 13_Member  | GO Biological Process | GO:0001938 | Positive regulation of endothelial cell proliferation | -3.73208 | -2.190 | 12/91  |
| 14_Summary | GO Biological Process | GO:0001501 | Skeletal system development                           | -10.7493 | -8.005 | 56/542 |
| 14_Member  | GO Biological Process | GO:0001501 | Skeletal system development                           | -10.7493 | -8.005 | 56/542 |
| 14_Member  | GO Biological Process | GO:0061448 | Connective tissue development                         | -10.3586 | -7.708 | 38/291 |
| 14_Member  | GO Biological Process | GO:0051216 | Cartilage development                                 | -8.95206 | -6.521 | 30/216 |
| 14_Member  | GO Biological Process | GO:0098868 | Bone growth                                           | -4.93908 | -3.182 | 10/48  |
| 14_Member  | GO Biological Process | GO:0002062 | Chondrocyte differentiation                           | -4.70417 | -2.981 | 16/123 |
| 14_Member  | GO Biological Process | GO:0003416 | Endochondral bone growth                              | -4.51769 | -2.831 | 9/43   |
| 14_Member  | GO Biological Process | GO:0060348 | Bone development                                      | -4.25221 | -2.620 | 23/240 |
| 14_Member  | GO Biological Process | GO:0048705 | Skeletal system morphogenesis                         | -4.04712 | -2.448 | 24/264 |

|            |                       |               |                                                                          |          |        |        |
|------------|-----------------------|---------------|--------------------------------------------------------------------------|----------|--------|--------|
| 14_Member  | GO Biological Process | GO:0060351    | Cartilage development involved in endochondral bone morphogenesis        | -3.11295 | -1.710 | 8/52   |
| 14_Member  | Reactome Gene Sets    | R-MMU-3000178 | ECM proteoglycans                                                        | -2.93579 | -1.576 | 7/43   |
| 14_Member  | GO Biological Process | GO:0002063    | Chondrocyte development                                                  | -2.75864 | -1.449 | 7/46   |
| 14_Member  | GO Biological Process | GO:0003417    | Growth plate cartilage development                                       | -2.63947 | -1.358 | 6/36   |
| 14_Member  | GO Biological Process | GO:0060350    | Endochondral bone morphogenesis                                          | -2.60453 | -1.332 | 9/76   |
| 14_Member  | GO Biological Process | GO:0060349    | Bone morphogenesis                                                       | -2.26629 | -1.093 | 11/117 |
| 14_Member  | GO Biological Process | GO:0003433    | Chondrocyte development involved in endochondral bone morphogenesis      | -2.04069 | -0.921 | 4/22   |
| 15_Summary | GO Biological Process | GO:0071363    | Cellular response to growth factor stimulus                              | -10.6256 | -7.894 | 60/609 |
| 15_Member  | GO Biological Process | GO:0071363    | Cellular response to growth factor stimulus                              | -10.6256 | -7.894 | 60/609 |
| 15_Member  | GO Biological Process | GO:0070848    | Response to growth factor                                                | -10.2238 | -7.584 | 60/623 |
| 15_Member  | GO Biological Process | GO:0007178    | Transmembrane receptor protein serine/threonine kinase signaling pathway | -7.62527 | -5.362 | 38/363 |
| 15_Member  | GO Biological Process | GO:0090287    | Regulation of cellular response to growth factor stimulus                | -6.63839 | -4.540 | 30/272 |

|            |                       |            |                                                                                                 |          |        |        |
|------------|-----------------------|------------|-------------------------------------------------------------------------------------------------|----------|--------|--------|
| 15_Member  | GO Biological Process | GO:0090092 | Regulation of transmembrane receptor protein serine/threonine kinase signaling pathway          | -4.80326 | -3.068 | 24/237 |
| 15_Member  | GO Biological Process | GO:0071772 | Response to BMP                                                                                 | -3.22601 | -1.798 | 17/180 |
| 15_Member  | GO Biological Process | GO:0071773 | Cellular response to BMP stimulus                                                               | -3.22601 | -1.798 | 17/180 |
| 15_Member  | GO Biological Process | GO:0030509 | BMP signaling pathway                                                                           | -3.0815  | -1.688 | 16/169 |
| 15_Member  | GO Biological Process | GO:0030510 | Regulation of BMP signaling pathway                                                             | -2.90807 | -1.557 | 11/97  |
| 15_Member  | GO Biological Process | GO:0090288 | Negative regulation of cellular response to growth factor stimulus                              | -2.8769  | -1.533 | 14/144 |
| 15_Member  | GO Biological Process | GO:0090101 | Negative regulation of transmembrane receptor protein serine/threonine kinase signaling pathway | -2.38058 | -1.179 | 11/113 |
| 16_Summary | GO Biological Process | GO:0045596 | Negative regulation of cell differentiation                                                     | -10.4204 | -7.748 | 71/798 |
| 16_Member  | GO Biological Process | GO:0045596 | Negative regulation of cell differentiation                                                     | -10.4204 | -7.748 | 71/798 |
| 16_Member  | GO Biological Process | GO:0010721 | Negative regulation of cell development                                                         | -4.03731 | -2.440 | 31/385 |
| 16_Member  | GO Biological Process | GO:0050768 | Negative regulation of neurogenesis                                                             | -2.24925 | -1.081 | 23/336 |

|            |                       |            |                                                                 |          |        |        |
|------------|-----------------------|------------|-----------------------------------------------------------------|----------|--------|--------|
| 16_Member  | GO Biological Process | GO:0051961 | Negative regulation of nervous system development               | -2.14119 | -0.996 | 24/363 |
| 17_Summary | GO Biological Process | GO:0097190 | Apoptotic signaling pathway                                     | -10.1065 | -7.487 | 59/611 |
| 17_Member  | GO Biological Process | GO:0097190 | Apoptotic signaling pathway                                     | -10.1065 | -7.487 | 59/611 |
| 17_Member  | GO Biological Process | GO:0097193 | Intrinsic apoptotic signaling pathway                           | -6.37114 | -4.313 | 31/295 |
| 17_Member  | GO Biological Process | GO:2001233 | Regulation of apoptotic signaling pathway                       | -5.75584 | -3.798 | 37/413 |
| 17_Member  | GO Biological Process | GO:0008630 | Intrinsic apoptotic signaling pathway in response to DNA damage | -5.28183 | -3.452 | 16/111 |
| 17_Member  | GO Biological Process | GO:2001234 | Negative regulation of apoptotic signaling pathway              | -4.99037 | -3.220 | 24/231 |
| 17_Member  | GO Biological Process | GO:2001242 | Regulation of intrinsic apoptotic signaling pathway             | -2.67127 | -1.383 | 15/168 |
| 17_Member  | GO Biological Process | GO:2001243 | Negative regulation of intrinsic apoptotic signaling pathway    | -2.42012 | -1.202 | 10/96  |
| 18_Summary | GO Biological Process | GO:0046545 | Development of primary female sexual characteristics            | -9.94871 | -7.348 | 23/118 |

|            |                       |            |                                                      |          |        |        |
|------------|-----------------------|------------|------------------------------------------------------|----------|--------|--------|
| 18_Member  | GO Biological Process | GO:0046545 | Development of primary female sexual characteristics | -9.94871 | -7.348 | 23/118 |
| 18_Member  | GO Biological Process | GO:0008585 | Female gonad development                             | -9.38033 | -6.865 | 22/115 |
| 18_Member  | GO Biological Process | GO:0048608 | Reproductive structure development                   | -8.58985 | -6.225 | 46/456 |
| 18_Member  | GO Biological Process | GO:0046660 | Female sex differentiation                           | -8.58219 | -6.225 | 24/149 |
| 18_Member  | GO Biological Process | GO:0061458 | Reproductive system development                      | -8.46955 | -6.131 | 46/460 |
| 18_Member  | GO Biological Process | GO:0045137 | Development of primary sexual characteristics        | -6.41571 | -4.343 | 26/220 |
| 18_Member  | GO Biological Process | GO:0008406 | Gonad development                                    | -6.02332 | -4.018 | 25/216 |
| 18_Member  | GO Biological Process | GO:0030728 | Ovulation                                            | -5.55739 | -3.654 | 8/25   |
| 18_Member  | GO Biological Process | GO:0001541 | Ovarian follicle development                         | -4.88449 | -3.141 | 12/70  |
| 18_Member  | GO Biological Process | GO:0022602 | Ovulation cycle process                              | -4.85503 | -3.115 | 10/49  |
| 18_Member  | GO Biological Process | GO:0042698 | Ovulation cycle                                      | -4.67165 | -2.955 | 11/62  |
| 18_Member  | GO Biological Process | GO:0007548 | Sex differentiation                                  | -4.23232 | -2.602 | 26/290 |
| 18_Member  | GO Biological Process | GO:0007292 | Female gamete generation                             | -3.69325 | -2.159 | 16/149 |
| 18_Member  | GO Biological Process | GO:0001542 | Ovulation from ovarian follicle                      | -2.79851 | -1.473 | 4/14   |
| 19_Summary | GO Biological Process | GO:0048589 | Developmental growth                                 | -9.66573 | -7.110 | 69/795 |

|            |                       |            |                                              |          |        |        |
|------------|-----------------------|------------|----------------------------------------------|----------|--------|--------|
| 19_Member  | GO Biological Process | GO:0048589 | Developmental growth                         | -9.66573 | -7.110 | 69/795 |
| 19_Member  | GO Biological Process | GO:0040008 | Regulation of growth                         | -9.38995 | -6.867 | 64/721 |
| 19_Member  | GO Biological Process | GO:0001558 | Regulation of cell growth                    | -9.28296 | -6.791 | 46/434 |
| 19_Member  | GO Biological Process | GO:0045926 | Negative regulation of growth                | -8.7566  | -6.351 | 33/260 |
| 19_Member  | GO Biological Process | GO:0016049 | Cell growth                                  | -8.63557 | -6.256 | 50/518 |
| 19_Member  | GO Biological Process | GO:0030308 | Negative regulation of cell growth           | -7.47296 | -5.227 | 26/195 |
| 19_Member  | GO Biological Process | GO:0048638 | Regulation of developmental growth           | -4.03444 | -2.440 | 32/403 |
| 19_Member  | GO Biological Process | GO:0048640 | Negative regulation of developmental growth  | -3.42074 | -1.944 | 14/127 |
| 19_Member  | GO Biological Process | GO:0048588 | Developmental cell growth                    | -2.52341 | -1.278 | 20/263 |
| 20_Summary | GO Biological Process | GO:0098609 | Cell-cell adhesion                           | -9.56105 | -7.014 | 66/748 |
| 20_Member  | GO Biological Process | GO:0098609 | Cell-cell adhesion                           | -9.56105 | -7.014 | 66/748 |
| 20_Member  | GO Biological Process | GO:0030155 | Regulation of cell adhesion                  | -9.34215 | -6.842 | 63/706 |
| 20_Member  | GO Biological Process | GO:0022407 | Regulation of cell-cell adhesion             | -5.80579 | -3.837 | 37/411 |
| 20_Member  | GO Biological Process | GO:0002683 | Negative regulation of immune system process | -5.73412 | -3.783 | 41/482 |
| 20_Member  | GO Biological Process | GO:0045785 | Positive regulation of cell adhesion         | -5.09043 | -3.302 | 36/424 |

|           |                       |            |                                              |          |        |        |
|-----------|-----------------------|------------|----------------------------------------------|----------|--------|--------|
| 20_Member | GO Biological Process | GO:0007159 | Leukocyte cell-cell adhesion                 | -4.85478 | -3.115 | 30/332 |
| 20_Member | GO Biological Process | GO:0007162 | Negative regulation of cell adhesion         | -4.71285 | -2.988 | 27/288 |
| 20_Member | GO Biological Process | GO:0070661 | Leukocyte proliferation                      | -4.32367 | -2.673 | 29/337 |
| 20_Member | GO Biological Process | GO:0050865 | Regulation of cell activation                | -3.94797 | -2.363 | 48/710 |
| 20_Member | GO Biological Process | GO:0022409 | Positive regulation of cell-cell adhesion    | -3.85276 | -2.291 | 23/255 |
| 20_Member | GO Biological Process | GO:0022408 | Negative regulation of cell-cell adhesion    | -3.42545 | -1.944 | 18/189 |
| 20_Member | GO Biological Process | GO:0002694 | Regulation of leukocyte activation           | -3.42368 | -1.944 | 44/668 |
| 20_Member | GO Biological Process | GO:0070663 | Regulation of leukocyte proliferation        | -3.39237 | -1.922 | 21/240 |
| 20_Member | GO Biological Process | GO:0050866 | Negative regulation of cell activation       | -3.35432 | -1.889 | 19/208 |
| 20_Member | GO Biological Process | GO:0050863 | Regulation of T cell activation              | -3.31971 | -1.863 | 25/313 |
| 20_Member | GO Biological Process | GO:1903037 | Regulation of leukocyte cell-cell adhesion   | -3.28243 | -1.835 | 24/297 |
| 20_Member | GO Biological Process | GO:0042110 | T cell activation                            | -3.19387 | -1.775 | 35/507 |
| 20_Member | GO Biological Process | GO:0002695 | Negative regulation of leukocyte activation  | -3.03912 | -1.655 | 17/187 |
| 20_Member | GO Biological Process | GO:0050670 | Regulation of lymphocyte proliferation       | -2.91797 | -1.564 | 19/226 |
| 20_Member | GO Biological Process | GO:0042098 | T cell proliferation                         | -2.91237 | -1.559 | 18/209 |
| 20_Member | GO Biological Process | GO:0032944 | Regulation of mononuclear cell proliferation | -2.85097 | -1.512 | 19/229 |

|           |                       |            |                                                     |          |        |        |
|-----------|-----------------------|------------|-----------------------------------------------------|----------|--------|--------|
| 20_Member | GO Biological Process | GO:0046651 | Lymphocyte proliferation                            | -2.62581 | -1.349 | 23/313 |
| 20_Member | GO Biological Process | GO:0050868 | Negative regulation of T cell activation            | -2.61619 | -1.341 | 12/121 |
| 20_Member | GO Biological Process | GO:0042129 | Regulation of T cell proliferation                  | -2.59666 | -1.328 | 15/171 |
| 20_Member | GO Biological Process | GO:0032943 | Mononuclear cell proliferation                      | -2.57364 | -1.309 | 23/316 |
| 20_Member | GO Biological Process | GO:0051250 | Negative regulation of lymphocyte activation        | -2.55018 | -1.302 | 14/156 |
| 20_Member | GO Biological Process | GO:1903038 | Negative regulation of leukocyte cell-cell adhesion | -2.28079 | -1.101 | 12/133 |
| 20_Member | GO Biological Process | GO:0042130 | Negative regulation of T cell proliferation         | -2.20261 | -1.045 | 8/72   |
| 20_Member | GO Biological Process | GO:1903039 | Positive regulation of leukocyte cell-cell adhesion | -2.13532 | -0.993 | 16/210 |
| 20_Member | GO Biological Process | GO:0051249 | Regulation of lymphocyte activation                 | -2.1313  | -0.993 | 34/568 |
| 20_Member | GO Biological Process | GO:0070664 | Negative regulation of leukocyte proliferation      | -2.08396 | -0.954 | 9/91   |

GO, gene ontology; KEGG, Kyoto Encyclopedia of Genes and Genomes.
